# Supplementary material for: Hydrothermally synthesized first acentric apatite (Bi5Na5)[PO4]6Cl2 with wide Bi–Na isomorphism and doubled c-axis
Source: Royal Society of Chemistry journal article supplement (doi:10.1039/d4nj00480a), 2024-01-01
Supplement: d4nj00480a1.pdf [file d4nj00480a1.pdf]

**Table S1.** Crystal data and structure refinement for  $(\text{Bi}_{2,494}\text{Na}_{2,505})(\text{PO}_4)_3\text{Cl}$ .

|                                                          |                                                                |
|----------------------------------------------------------|----------------------------------------------------------------|
| Formula                                                  | $(\text{Bi}_{2,494}\text{Na}_{2,505})(\text{PO}_4)_3\text{Cl}$ |
| Formula weight                                           | 899.25                                                         |
| Crystal system                                           | hexagonal                                                      |
| Space group, $Z$                                         | $P-6, 4$                                                       |
| $a$ , Å                                                  | 9.7197(7)                                                      |
| $c$ , Å                                                  | 13.8019(10)                                                    |
| $V$ , Å <sup>3</sup>                                     | 1129.2(1)                                                      |
| $D_x$ , g/cm <sup>3</sup>                                | 5.29                                                           |
| $\mu$ , mm <sup>-1</sup>                                 | 39.62                                                          |
| Wavelength, Å                                            | 0.71073                                                        |
| $\theta$ range/degree                                    | 2.83- 30.77                                                    |
| Refl. collected/unique/ $R_{int}$                        | 110703 / 2019/ 0.0546                                          |
| Completeness to $\theta$ , %                             | 0.95                                                           |
| Parameters                                               | 140                                                            |
| $GOF (S)$                                                | 1.066                                                          |
| $R_{all}, R_{gt}, R_{wgt}$                               | 0.0494, 0.0415, 0.0804                                         |
| $\Delta\rho_{min}/\Delta\rho_{max}, \text{e}/\text{Å}^3$ | -1.652/ 2.144                                                  |

$$^1 R_{gt} = \Sigma. //F_o // - /F_c // / = \Sigma /F_o / \text{ and } R_{wgt} = [\Sigma w (F_o^2 - F_c^2)^2 / \Sigma w (F_o^2)^2]^{1/2} \text{ for } F_o^2 > 2\sigma(F_o^2).$$

**Table S2.** Atomic coordinates and equivalent displacement parameters for  $(\text{Bi}_{2,494}\text{Na}_{2,505})(\text{PO}_4)_3\text{Cl}$ .

| Atom             | Wyckoff notation, symmetry, multiplicity | Composition                            |             |            |            | $U_{equ}$ , Å <sup>2</sup> |
|------------------|------------------------------------------|----------------------------------------|-------------|------------|------------|----------------------------|
|                  |                                          |                                        | $x/a$       | $y/b$      | $z/c$      |                            |
| <b>M1</b> (Bi2)* | 3j, $m$ , 0.5                            | Bi                                     | 0.2582(1)   | 0.2671(1)  | 0          | 0.019(2)                   |
| <b>M2</b> (Bi4)  | 2i,3, 0.333                              | $\text{Bi}_{0,1300}\text{Na}_{0,2033}$ | 0.6667      | 0.3333     | 0.3817(2)  | 0.0249(6)                  |
| <b>M3</b> (Bi5)  | 2i, 3, 0.333                             | $\text{Bi}_{0,15}\text{Na}_{0,1833}$   | 0.3333      | 0.6667     | 0.3790(2)  | 0.0212(5)                  |
| <b>M4</b> (Bi6)  | 6l, 1, 1.0                               | $\text{Bi}_{0,7}\text{Na}_{0,3}$       | -0.0091 (1) | 0.2555(1)  | 0.2606(1)  | 0.0145(2)                  |
| <b>M5</b> (Bi16) | 2i, 3, 0.333                             | $\text{Bi}_{0,0333}\text{Na}_{0,3000}$ | 0.3333      | 0.6667     | 0.1299(4)  | 0.0191(1)                  |
| <b>M6</b> (Bi13) | 3k, $m$ , 0.5                            | $\text{Bi}_{0,15}\text{Na}_{0,35}$     | 0.2521(4)   | 0.2579(3)  | 0.5        | 0.0470(8)                  |
| <b>M7</b> (Bi14) | 2i, 3, 0.333                             | Na                                     | 0.6667      | 0.3333     | 0.1141(9)  | 0.019(3)                   |
| <b>P1</b> (P1)   | 6l, 1, 1.0                               | P                                      | 0.3795(7)   | 0.0272(7)  | 0.2504(2)  | 0.008(1)                   |
| <b>P2</b> (P3)   | 3j, $m$ , 0.5                            | P                                      | 0.3714(8)   | -0.0275(9) | 0          | 0.011(1)                   |
| <b>P3</b> (P4)   | 3j, $m$ , 0.5                            | P                                      | 0.5877(7)   | 0.6129(8)  | 0.5        | 0.014(1)                   |
| <b>Cl1</b> (Cl1) | 2g,3, 0.333                              | Cl                                     | 0           | 0          | 0.01266(5) | 0.0228(9)                  |
| <b>Cl2</b> (Cl3) | 2g,3, 0.333                              | Cl                                     | 0           | 0          | 0.3737(5)  | 0.028(1)                   |
| <b>O1</b> (O2)   | 6l, 1, 1.0                               | O                                      | 0.330(2)    | 0.484(2)   | 0.2563(7)  | 0.030(4)                   |
| <b>O2</b> (O4)   | 3j, $m$ , 0.5                            | O                                      | 0.465(2)    | 0.150(2)   | 0          | 0/014(3)                   |
| <b>O3</b> (O5)   | 3j, $m$ , 0.5                            | O                                      | 0.849(2)    | 0.350(3)   | 0.5        | 0.034(5)                   |
| <b>O4</b> (O6)   | 6l, 1, 1.0                               | O                                      | -0.472(2)   | 0.111(2)   | 0.2530(9)  | 0.032(4)                   |
| <b>O5</b> (O8)   | 6l, 1, 1.0                               | O                                      | 0.095(2)    | 0.350(2)   | 0.0891(8)  | 0.024(3)                   |
| <b>O6</b> (O9)   | 3j, $m$ , 0.5                            | O                                      | 0.401(2)    | 0.524(2)   | 0.5        | 0.019(4)                   |
| <b>O7</b> (O11)  | 6l, 1, 1.0                               | O                                      | -0.278(2)   | 0.082(2)   | 0.1623(8)  | 0.029(3)                   |
| <b>O8</b> (O12)  | 6l, 1, 1.0                               | O                                      | 0.901(2)    | 0.637(2)   | 0.3348(8)  | 0.028(3)                   |
| <b>O9</b> (O16)  | 6l, 1, 1.0                               | O                                      | 0.651(2)    | 0.726(2)   | 0.409(9)   | 0.037(4)                   |
| <b>O10</b> (O17) | 3j, $m$ , 0.5                            | O                                      | 0.482(2)    | -0.105(3)  | 0          | 0.023(4)                   |

\*In brackets are the destinations of positions in group  $P3$ .

**Table S3.** Interatomic distances for  $(\text{Bi}_{2,494}\text{Na}_{2,505})(\text{PO}_4)_3\text{Cl}$ .

| <b>Bond</b>       | <b>Distance, Å</b> | <b>Bond</b>       | <b>Distance, Å</b> |
|-------------------|--------------------|-------------------|--------------------|
| <b>M1</b> – O17   | 2.13(2)            | <b>M2</b> – O5x3  | 2.35(2)            |
| <b>M1</b> – O11x2 | 2.43(1)            | <b>M2</b> – O6x3  | 2.59(2)            |
| <b>M1</b> – O8x2  | 2.44(1)            | <b>M2</b> – O12x3 | 2.76(1)            |
| Average           | 2.37               | Average           | 2.57               |
| <b>M3</b> -O2x3   | 2.44 (1)           | <b>M5</b> -O2x3   | 2.48(2)            |
| <b>M3</b> -O9x3   | 2,46(2)            | <b>M5</b> -O17x3  | 2.65(2)            |
| Average           | 2.45               | Average           | 2.56               |
| <b>M4</b> -O16    | 2.22(1)            | <b>M6</b> -O9     | 2,. 5(2)           |
| <b>M4</b> -O6     | 2.23(2)            | <b>M6</b> -O12x2  | 2.51(1)            |
| <b>M4</b> -O12    | 2.39(1)            | <b>M6</b> -O16    | 2.62(2)            |
| <b>M4</b> -O8     | 2.56(1)            | Average           | 2.47               |
| <b>M4</b> -O11    | 2.66(2)            | <b>M7</b> -O4x3   | 2.45(1)            |
| Average           | 2.41               | <b>M7</b> -O6x3   | 2.69(2)            |
| P1 – O11          | 1.49(1)            | <b>M7</b> -O11x3  | 2.83(2)            |
| P1 – O6           | 1.49(2)            | Average           | 2.66               |
| P1 – O12          | 1.52(1)            | P3 – O4           | 1.49(2)            |
| P1 – O2           | 1.53(2)            | P3 – O8x2         | 1.57(1)            |
| Average           | 1.51               | P 3– O17          | 1.59(2)            |
| P4– O5            | 1,50(2)            | Average           | 1.55               |
| P4– O9            | 1,57(2)            |                   |                    |
| P4– O16x2         | 1,58(1)            |                   |                    |
| Average           | 1.56               |                   |                    |
